# Supplementary material for: Integrating GIS and the Information Value Method for Flood Susceptibility Mapping in Dhaka Division, Bangladesh
Source: Research Square preprint supplement (doi:10.21203/rs.3.rs-7505550/v1), 2025-09-15
Supplement: Supplementary file 1 [file 0da6c1163af8ab5da8d8beea.docx]

**Ethical Statement**

I, Samiya Tasnim Huq testify on behalf of all co-authors that our article submitted followed ethical principles in publishing.

Title: Integrating GIS and the Information Value Method for Flood Susceptibility Mapping in Dhaka Division, Bangladesh.

Hereby, we, the authors, consciously assure that:

- This research presents an accurate account of the work performed, all data presented are accurate and methodologies detailed enough to permit others to replicate the work
- This work has not been published in whole or in part elsewhere.
- The paper is not currently under consideration by any other journal.
- The paper truthfully and completely reflects our research, analysis, and findings.
- All co-authors (Samiya Tasnim Huq, Mohammad Ismail Hossain, Md Asikul Islam Anik) have made substantial contributions to the study, including data processing, methodology design, analysis, and manuscript preparation.
- Results are contextualized within prior research in flood susceptibility mapping (e.g., Ahmed et al., 2022; Chen & Li, 2020), with all sources properly cited.

We agree with the above statements and declare that this submission follows the policies of Geoscience Letters, as outlined in the Guide for Authors and in the Ethical Statement.

Date: 1 September, 2025

Corresponding author’s name: Samiya Tasnim Huq

Email: [samiyatasnim123@gmail.com](mailto:samiyatasnim123@gmail.com)
