# Supplementary material for: Integrating GIS and the Information Value Method for Flood Susceptibility Mapping in Dhaka Division, Bangladesh
Source: Research Square preprint supplement (doi:10.21203/rs.3.rs-7505550/v1), 2025-09-15
Supplement: Supplementary file 2 [file 89cdad8a20e179cc43cbb9be.docx]

**Declaration of Interest Statement**

The authors declare that they have no known competing financial interests or personal relationships that could have appeared to influence the work reported in this paper.

The author is an Editorial Board Member/Editor-in-Chief/Associate Editor/Guest Editor for this journal and was not involved in the editorial review or the decision to publish this article.

The authors declare the following financial interests/personal relationships which may be considered as potential competing interests:

Date: 27 July, 2025

Corresponding author’s name: Samiya Tasnim Huq

Institute of Disaster Management

Khulna University of Engineering & Technology

Email: [samiyatasnim123@gmail.com](mailto:samiyatasnim123@gmail.com)
