# Supplementary material for: Integrating GIS and the Information Value Method for Flood Susceptibility Mapping in Dhaka Division, Bangladesh
Source: Research Square preprint supplement (doi:10.21203/rs.3.rs-7505550/v1), 2025-09-15
Supplement: Supplementary file 3 [file cfd99165d1cbb4260652e47f.docx]

**Highlights**

1. First integration of GIS and the Information Value Method (IVM) for flood susceptibility mapping in Dhaka Division, Bangladesh.
2. Eleven geospatial factors (elevation, rainfall, drainage density, etc.) were quantitatively weighted using IVM.
3. Validation showed that 85% of historical floods occurred in the predicted high-risk zones.
4. Produced actionable flood risk maps to support urban planning and disaster management.
5. Utilized publicly available data sources (USGS, HydroSHED, FAO), ensuring transparency and reproducibility.
